# Supplementary material for: Modified Hamiltonian in FEP Calculations for Reducing the Computational Cost of Electrostatic Interactions
Source: PubMed Central journal article supplement — J Chem Inf Model. 2022 May 31;62(11):2846–56. doi: 10.1021/acs.jcim.1c01532 (PMC9199518; doi:10.1021/acs.jcim.1c01532), 2022-05-31
Supplement: ci1c01532_si_001.pdf [file ci1c01532_si_001.pdf]

## Supporting Information for

# A modified Hamiltonian in FEP calculations for reducing the computational cost of electrostatic interactions

*Hiraku Oshima<sup>†</sup>, Yuji Sugita<sup>\*†‡§</sup>*

<sup>†</sup> Laboratory for Biomolecular Function Simulation, RIKEN Center for Biosystems Dynamics Research, Integrated Innovation Building 7F, 6-7-1 Minatojima-minamimachi, Chuo-ku, Kobe, Hyogo 650-0047, Japan

<sup>‡</sup> Theoretical Molecular Science Laboratory, RIKEN Cluster for Pioneering Research, 2-1 Hirosawa, Wako-shi, Saitama 351-0198, Japan

<sup>§</sup> Computational Biophysics Research Team, RIKEN Center for Computational Science, Integrated Innovation Building 7F, 6-7-1 Minatojima-minamimachi, Chuo-ku, Kobe, Hyogo 650-0047, Japan

Corresponding Author:

\*E-mail: [sugita@riken.jp](mailto:sugita@riken.jp)

Contents:

Figures S1-S6

Tables S1-S7

Computational methods

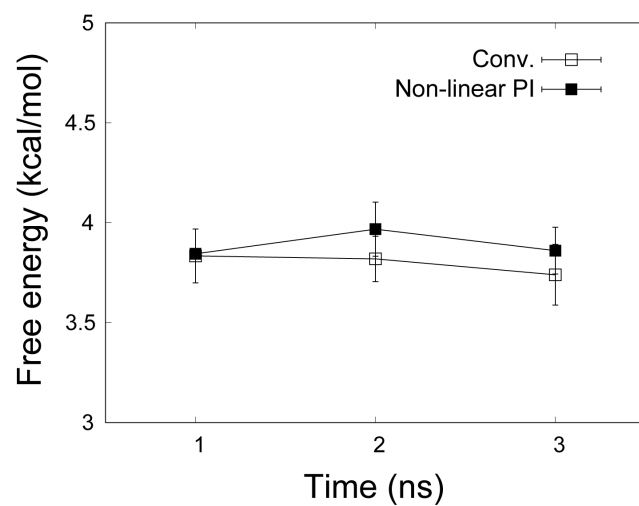

Figure S1. Time series of free energies for the mutation of the side-chain analog from Leu to Tyr in water.

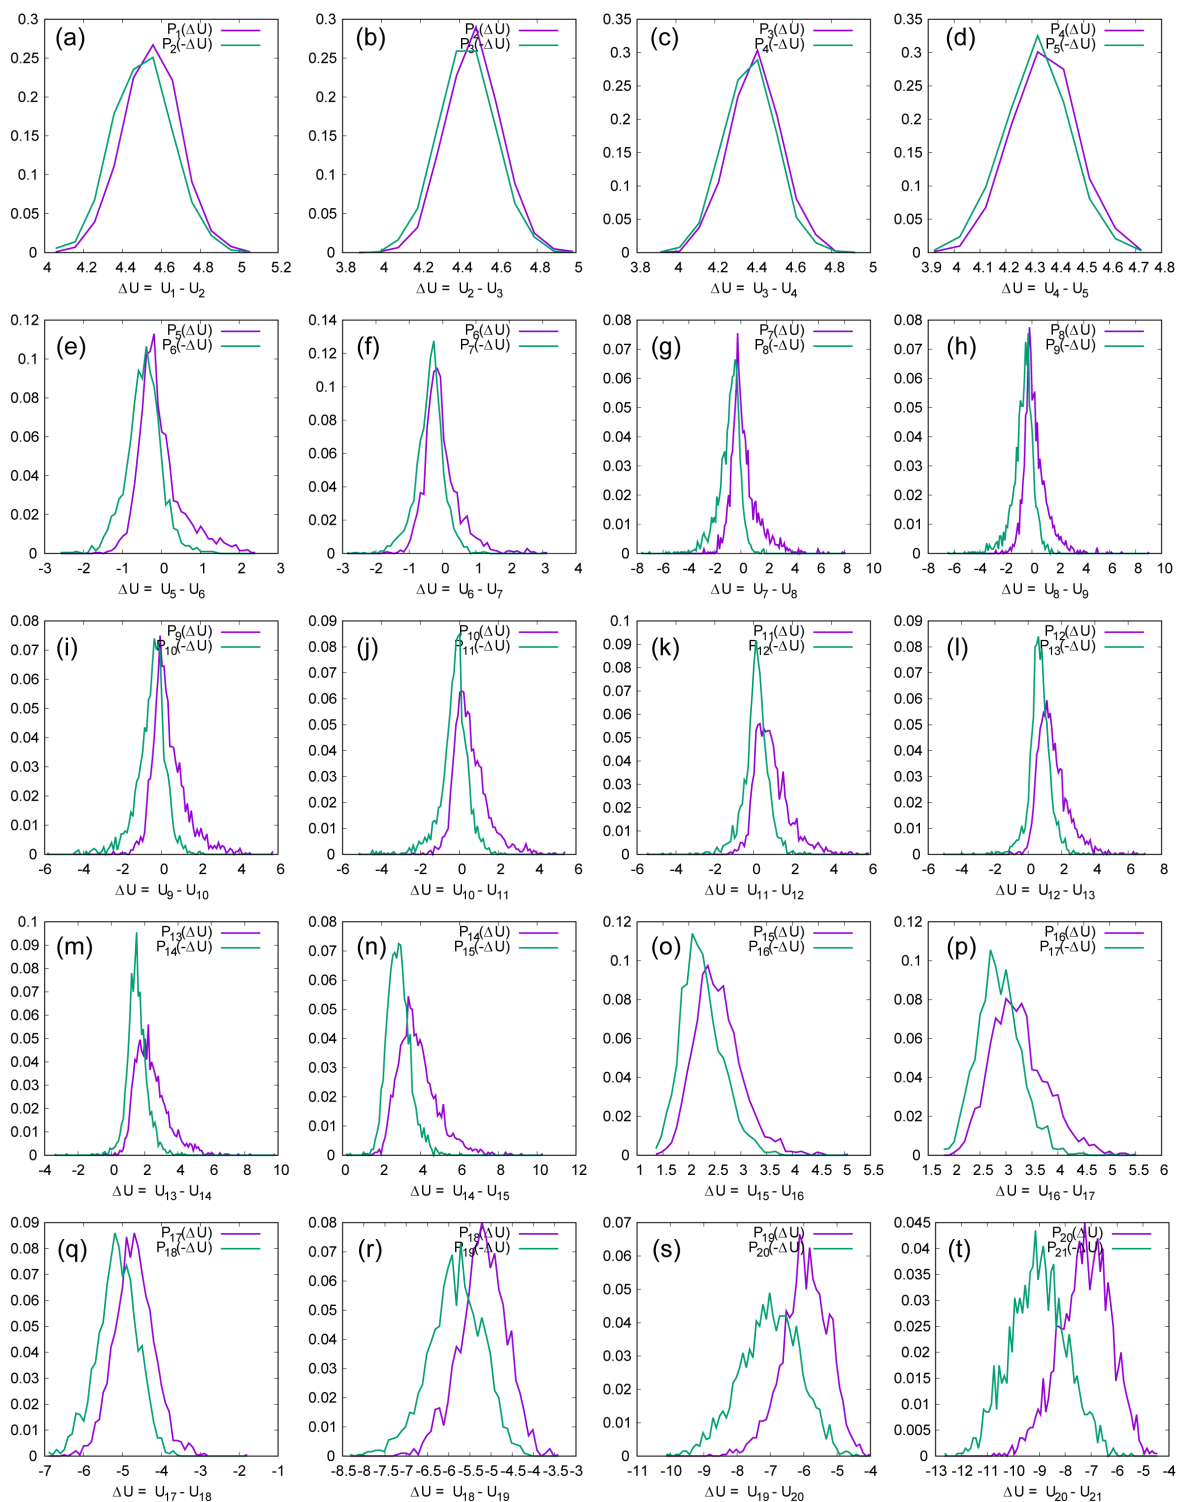

Figure S2. Distributions of energy differences between adjacent windows for conventional FEP in the three-step procedure. Purple and green lines represent the forward and backward energy differences, respectively.

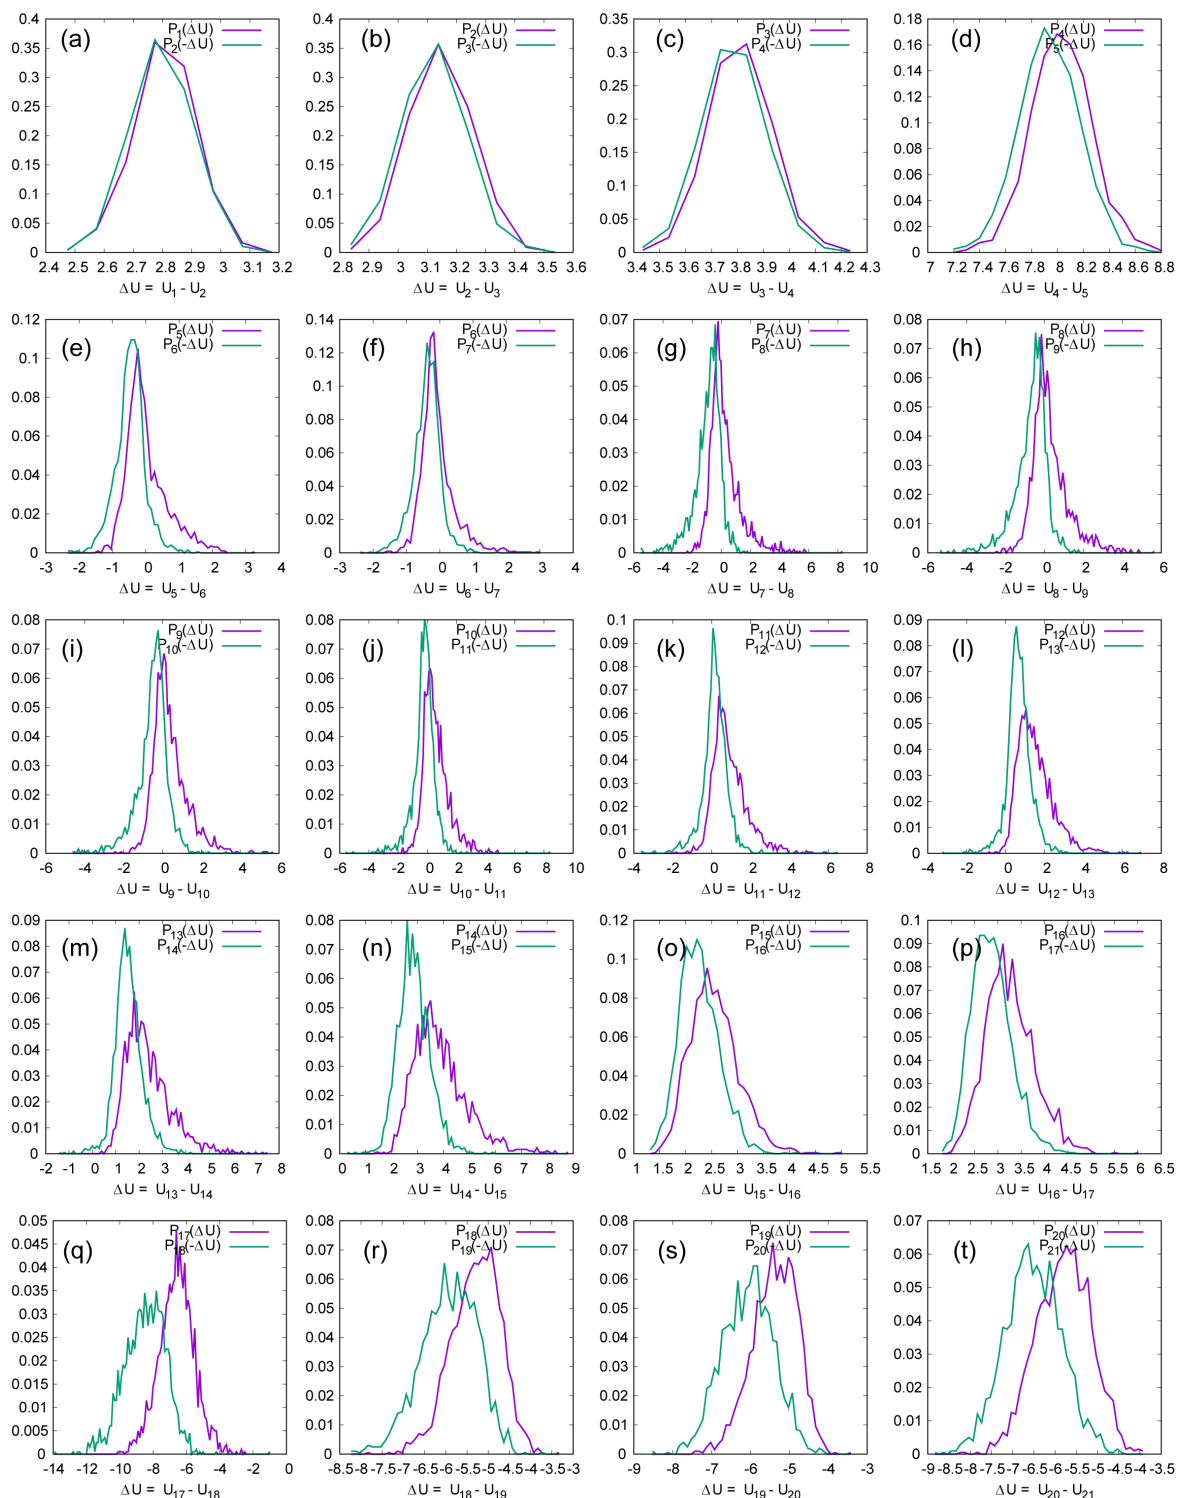

Figure S3. Distributions of energy differences between adjacent windows for the modified method in the three-step procedure. Purple and green lines represent the forward and backward energy differences, respectively.

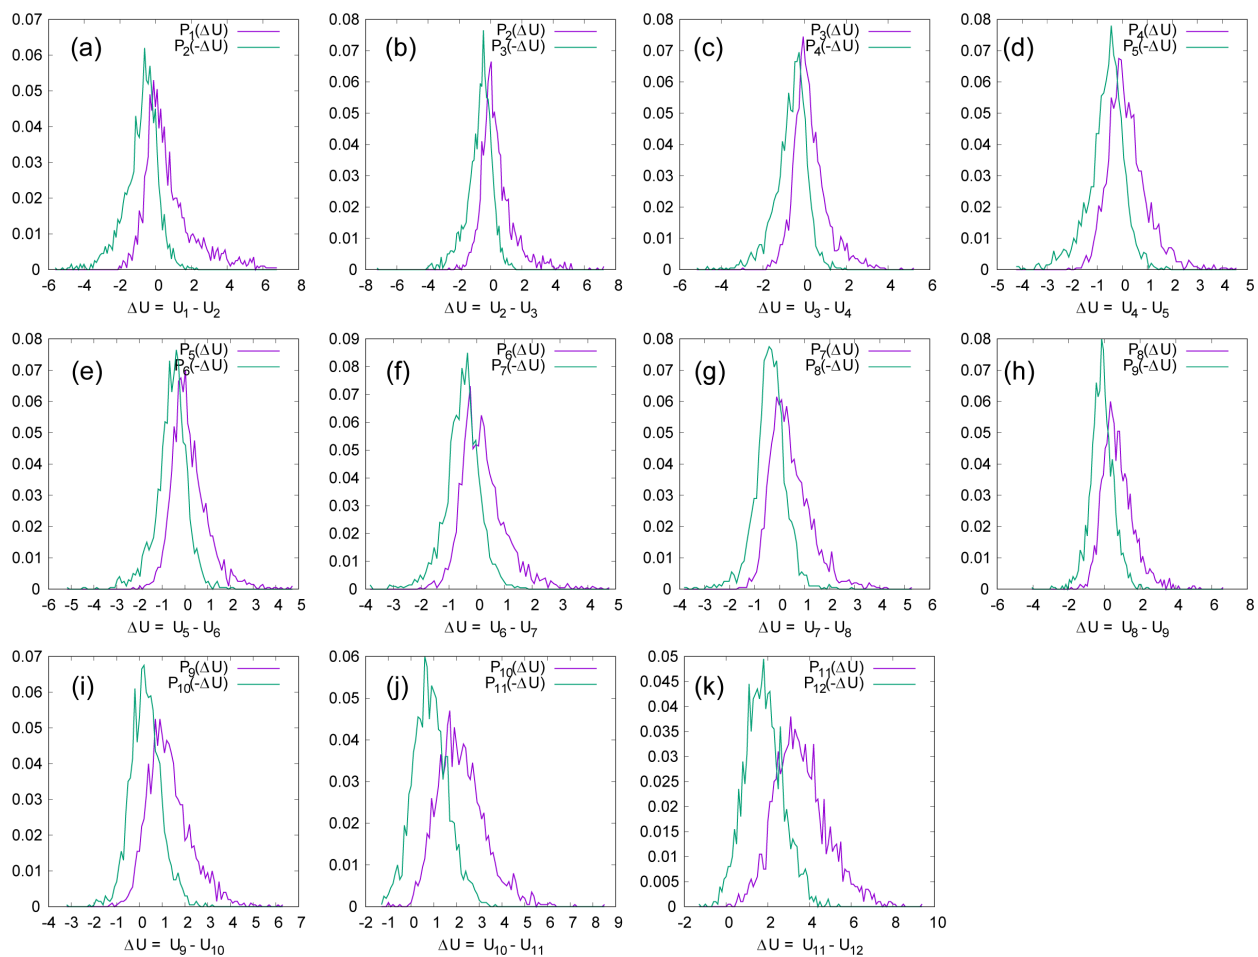

Figure S4. Distributions of energy differences between adjacent windows for conventional FEP in the one-step procedure. Purple and green lines represent the forward and backward energy differences, respectively.

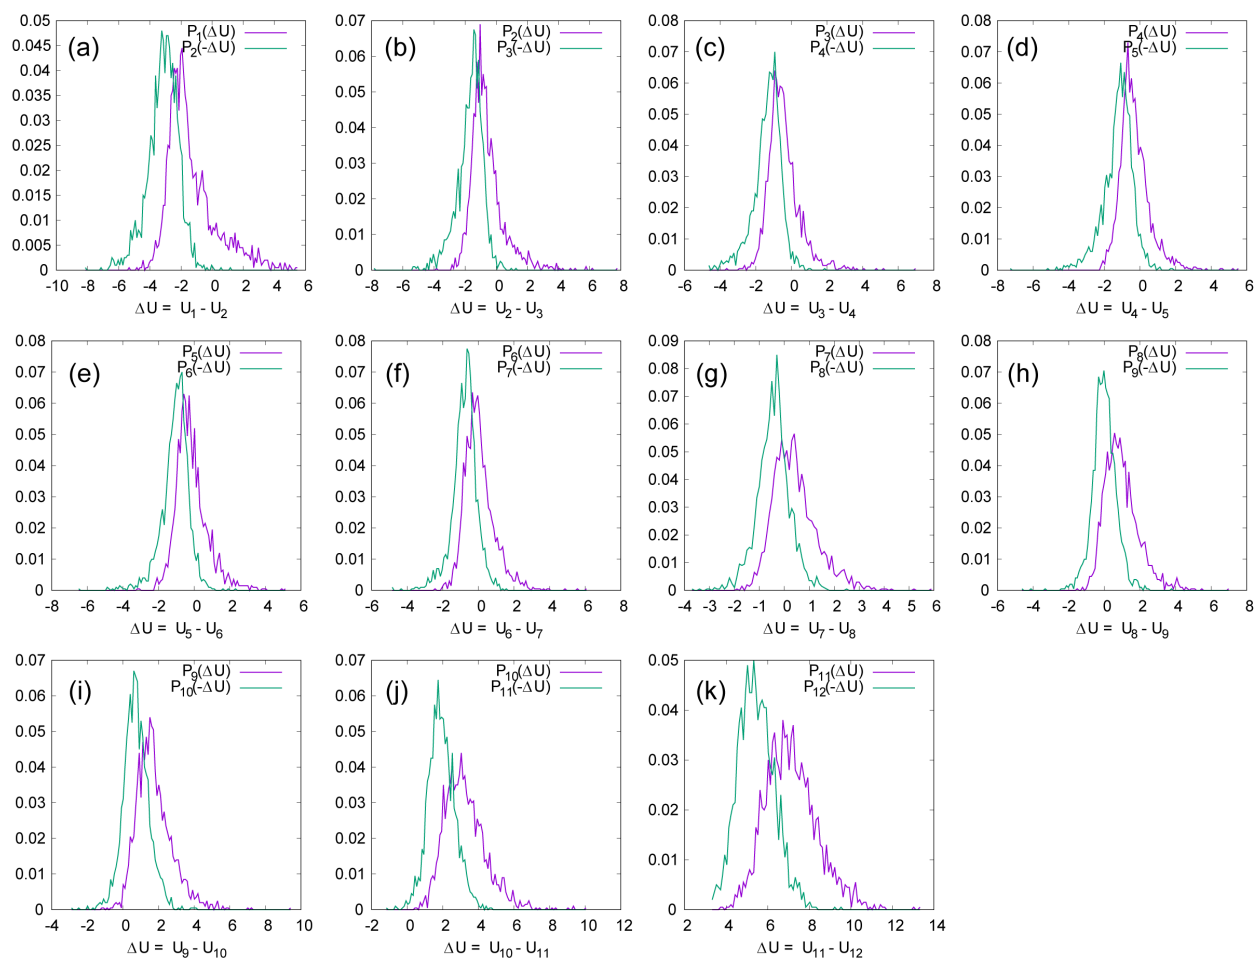

Figure S5. Distributions of energy differences between adjacent windows for the modified method in the one-step procedure. Purple and green lines represent the forward and backward energy differences, respectively.

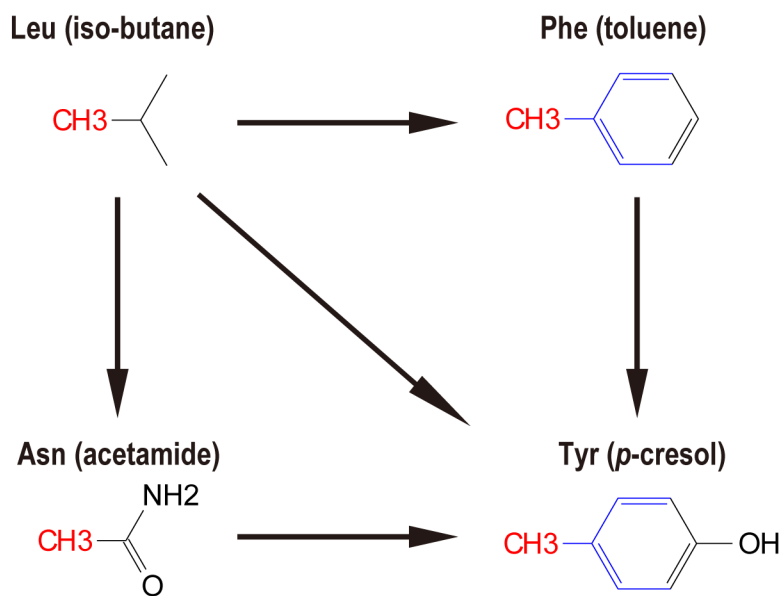

Figure S6. Chemical structures of amino acid side chain analogs and their mutations. The names in parentheses represent the chemical compounds corresponding to the amino acid side chain analog. The CH3 group, shown in red is the common part during the mutations of Leu to Phe, Leu to Tyr, Leu to Asn, and Asn to Tyr. Blue-colored atoms are also included in the common part during the mutation of Phe to Tyr.

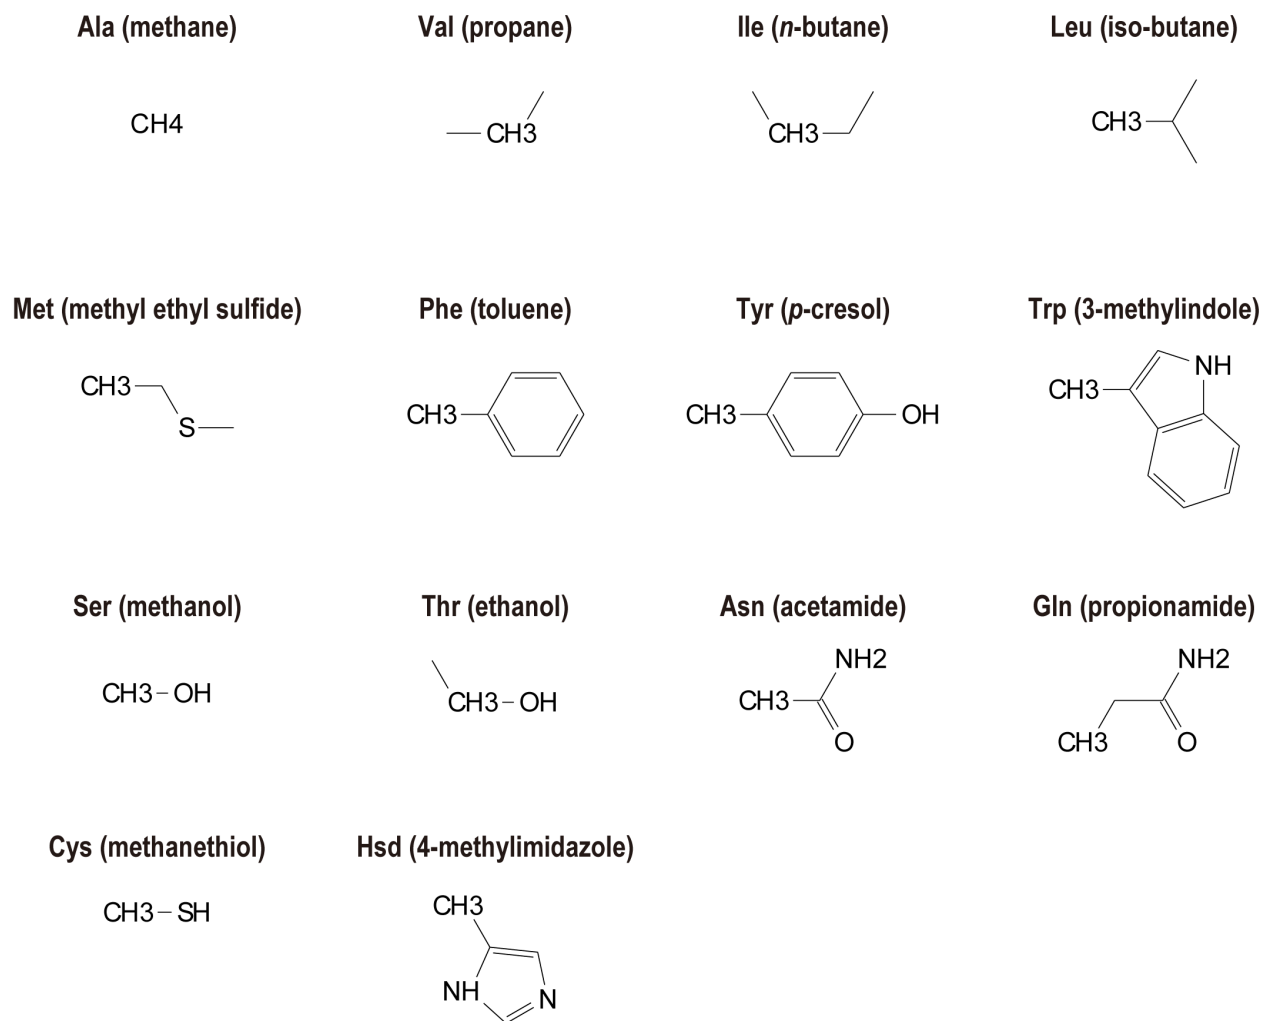

Figure S7. Chemical structures of amino acid side chain analogs. The names in parentheses represent the chemical compounds corresponding to the amino acid side chain analog. The force field parameters of CH<sub>3</sub> are modified as described in Ref.<sup>1</sup>.



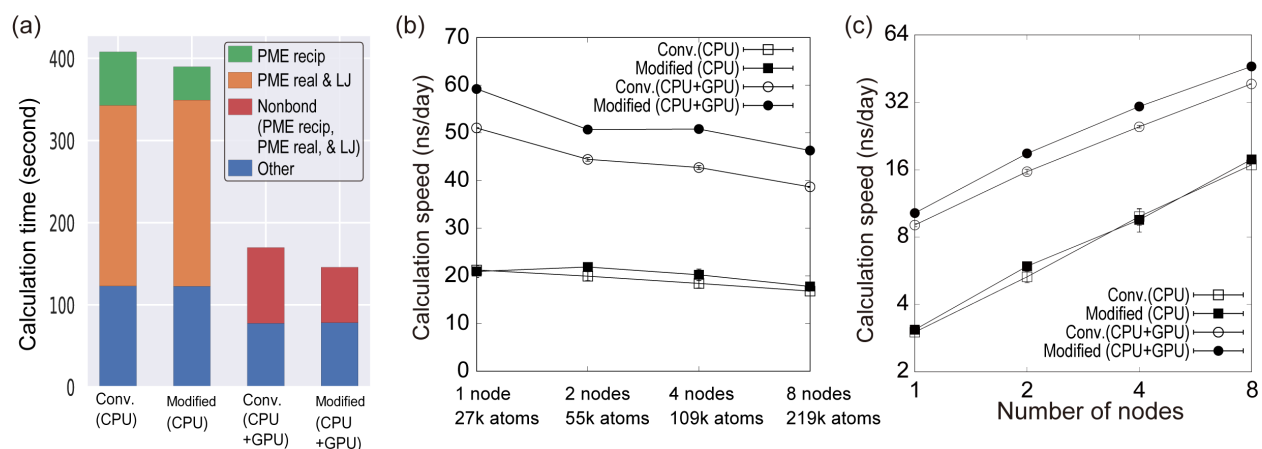

Figure S8. Computer times of FEP using the r-RESPA integrator with a 2.5-fs time step. (a) Calculation times for 100-ps FEP simulations. Times for PME reciprocal-space and real-space calculations are colored green and orange, respectively, while times for other calculations are colored blue. For the CPU+GPU hybrid computation, calculation times for nonbonded interactions are colored red. (b) Performance of FEP simulations in fixing the number of atoms per processor. (c) Performance of FEP simulations for the large system (219k atoms).

Table S1. Relative solvation free energies of amino acid side-chain analogs.

|            | Three-step procedure           |                            | One-step procedure             |                            | Experiment <sup>2</sup><br>(kcal/mol) |
|------------|--------------------------------|----------------------------|--------------------------------|----------------------------|---------------------------------------|
|            | Conventional FEP<br>(kcal/mol) | Modified FEP<br>(kcal/mol) | Conventional FEP<br>(kcal/mol) | Modified FEP<br>(kcal/mol) |                                       |
| Leu to Phe | -2.58 ± 0.05                   | -2.61 ± 0.07               | -2.58 ± 0.03                   | -2.56 ± 0.08               | -3.04                                 |
| Leu to Asn | -10.49 ± 0.07                  | -10.54 ± 0.05              | -10.46 ± 0.02                  | -10.41 ± 0.03              | -11.96                                |
| Leu to Tyr | -7.11 ± 0.04                   | -7.01 ± 0.03               | -7.09 ± 0.05                   | -7.02 ± 0.05               | -8.39                                 |
| Phe to Tyr | -4.50 ± 0.04                   | -4.50 ± 0.07               | -4.51 ± 0.03                   | -4.48 ± 0.04               | -5.35                                 |
| Asn to Tyr | 3.47 ± 0.07                    | 3.41 ± 0.07                | 3.39 ± 0.12                    | 3.44 ± 0.07                | 3.57                                  |

Table S2. Absolute solvation free energies of amino acid side-chain analogs.

|     | Conventional FEP<br>(kcal/mol) | Modified FEP<br>(kcal/mol) | Experiment <sup>2</sup><br>(kcal/mol) |
|-----|--------------------------------|----------------------------|---------------------------------------|
| Ala | 2.48 ± 0.02                    | 2.47 ± 0.03                | 1.94                                  |
| Asn | -7.56 ± 0.02                   | -7.52 ± 0.03               | -9.68                                 |
| Cys | -0.06 ± 0.05                   | -0.02 ± 0.04               | -1.24                                 |
| Gln | -7.09 ± 0.02                   | -7.16 ± 0.09               | -9.38                                 |
| Hsd | -9.72 ± 0.07                   | -9.68 ± 0.04               | -10.27                                |
| Ile | 2.71 ± 0.06                    | 2.82 ± 0.15                | 2.15                                  |
| Leu | 2.92 ± 0.07                    | 2.86 ± 0.09                | 2.28                                  |
| Met | 1.20 ± 0.09                    | 1.07 ± 0.07                | -1.48                                 |
| Phe | 0.27 ± 0.04                    | 0.37 ± 0.06                | -0.76                                 |
| Ser | -4.67 ± 0.11                   | -4.71 ± 0.07               | -5.06                                 |
| Thr | -4.63 ± 0.08                   | -4.52 ± 0.04               | -4.88                                 |
| Trp | -4.61 ± 0.10                   | -4.73 ± 0.05               | -5.88                                 |
| Tyr | -4.18 ± 0.17                   | -4.16 ± 0.11               | -6.11                                 |
| Val | 2.61 ± 0.04                    | 2.55 ± 0.02                | 1.99                                  |

Table S3. Free-energy changes in binding affinities of Barnase-Barstar complex upon Y29A mutation.

|                         | $\Delta G_{\text{mut}}^{\text{complex}}$<br>(kcal/mol) | $\Delta G_{\text{mut}}^{\text{monomer}}$ (kcal/mol) | $\Delta\Delta G$ (kcal/mol) |
|-------------------------|--------------------------------------------------------|-----------------------------------------------------|-----------------------------|
| Conventional FEP        | $10.07 \pm 0.29$                                       | $8.72 \pm 0.12$                                     | $1.34 \pm 0.32$             |
| Modified FEP            | $10.60 \pm 0.41$                                       | $8.93 \pm 0.15$                                     | $1.67 \pm 0.44$             |
| Experiment <sup>3</sup> |                                                        |                                                     | 3.4                         |

Table S4. Performance of FEP simulations when fixing the number of atoms per processor (Velocity Verlet integrator with 2.0-fs time step).

| Number of nodes | Number of atoms | Conventional FEP (CPU) (ns/day) | Modified FEP (CPU) (ns/day) | Conventional FEP (CPU+GPU) (ns/day) | Modified FEP (CPU+GPU) (ns/day) |
|-----------------|-----------------|---------------------------------|-----------------------------|-------------------------------------|---------------------------------|
| 1               | 27k atoms       | 14.6 ± 0.0                      | 16.1 ± 0.0                  | 31.4 ± 0.6                          | 40.0 ± 1.0                      |
| 2               | 55k atoms       | 14.3 ± 0.0                      | 14.9 ± 0.8                  | 29.3 ± 0.4                          | 36.8 ± 0.2                      |
| 4               | 109k atoms      | 12.4 ± 0.6                      | 14.5 ± 0.8                  | 27.1 ± 0.4                          | 35.5 ± 0.4                      |
| 8               | 219k atoms      | 11.2 ± 0.0                      | 12.5 ± 0.0                  | 22.9 ± 0.0                          | 30.9 ± 0.1                      |

Table S5. Performance of FEP simulations for the large system (219k atoms) (Velocity Verlet integrator with 2.0-fs time step).

| Number of nodes | Conventional FEP<br>(CPU)<br>(ns/day) | Modified FEP<br>(CPU)<br>(ns/day) | Conventional FEP<br>(CPU+GPU)<br>(ns/day) | Modified FEP<br>(CPU+GPU)<br>(ns/day) |
|-----------------|---------------------------------------|-----------------------------------|-------------------------------------------|---------------------------------------|
| 1               | $2.1 \pm 0.0$                         | $2.2 \pm 0.0$                     | $5.3 \pm 0.2$                             | $6.4 \pm 0.3$                         |
| 2               | $4.0 \pm 0.0$                         | $4.0 \pm 0.3$                     | $9.1 \pm 0.3$                             | $11.8 \pm 0.3$                        |
| 4               | $6.7 \pm 0.4$                         | $6.9 \pm 0.5$                     | $14.7 \pm 0.4$                            | $19.3 \pm 0.3$                        |
| 8               | $11.2 \pm 0.0$                        | $12.5 \pm 0.0$                    | $22.9 \pm 0.0$                            | $30.9 \pm 0.1$                        |

Table S6. Performance of FEP simulations when fixing the number of atoms per processor (r-RESPA integrator with 2.5-fs time step).

| Number of nodes | Number of atoms | Conventional FEP (CPU) (ns/day) | Modified FEP (CPU) (ns/day) | Conventional FEP (CPU+GPU) (ns/day) | Modified FEP (CPU+GPU) (ns/day) |
|-----------------|-----------------|---------------------------------|-----------------------------|-------------------------------------|---------------------------------|
| 1               | 27k atoms       | 21.2 ± 0.0                      | 20.9 ± 1.2                  | 51.0 ± 0.1                          | 59.2 ± 0.0                      |
| 2               | 55k atoms       | 19.9 ± 0.9                      | 21.9 ± 0.0                  | 44.5 ± 0.4                          | 50.7 ± 0.1                      |
| 4               | 109k atoms      | 18.4 ± 1.0                      | 20.2 ± 1.2                  | 42.7 ± 0.4                          | 50.8 ± 0.6                      |
| 8               | 219k atoms      | 16.8 ± 0.0                      | 17.8 ± 0.0                  | 38.7 ± 0.1                          | 46.3 ± 0.1                      |

Table S7. Performance of FEP simulations for the large system (219k atoms) (r-RESPA integrator with 2.5-fs time step).

| Number of nodes | Conventional FEP<br>(CPU)<br>(ns/day) | Modified FEP<br>(CPU)<br>(ns/day) | Conventional FEP<br>(CPU+GPU)<br>(ns/day) | Modified FEP<br>(CPU+GPU)<br>(ns/day) |
|-----------------|---------------------------------------|-----------------------------------|-------------------------------------------|---------------------------------------|
| 1               | 3.0 ± 0.0                             | 3.1 ± 0.0                         | 9.1 ± 0.3                                 | 10.2 ± 0.3                            |
| 2               | 5.3 ± 0.4                             | 5.9 ± 0.0                         | 15.7 ± 0.4                                | 18.9 ± 0.4                            |
| 4               | 9.9 ± 0.7                             | 9.6 ± 0.8                         | 24.9 ± 0.4                                | 30.6 ± 0.2                            |
| 8               | 16.8 ± 0.0                            | 17.8 ± 0.0                        | 38.7 ± 0.1                                | 46.3 ± 0.1                            |





## REFERENCES

- (1) Shirts, M. R.; Pitera, J. W.; Swope, W. C.; Pande, V. S. Extremely Precise Free Energy Calculations of Amino Acid Side Chain Analogs: Comparison of Common Molecular Mechanics Force Fields for Proteins. *J. Chem. Phys.* **2003**, *119*, 5740–5761. <https://doi.org/10.1063/1.1587119>.
- (2) Wolfenden, R.; Andersson, L.; Cullis, P. M.; Southgate, C. C. B. Affinities of Amino Acid Side Chains for Solvent Water. *Biochemistry* **1981**, *20*, 849–855. <https://doi.org/10.1021/bi00507a030>.
- (3) Schreiber, G.; Fersht, A. R. Energetics of Protein-Protein Interactions: Analysis of the Barnase-Barstar Interface by Single Mutations and Double Mutant Cycles. *J. Mol. Biol.* **1995**, *248*, 478–486. [https://doi.org/10.1016/S0022-2836\(95\)80064-6](https://doi.org/10.1016/S0022-2836(95)80064-6).
